# Supplementary material for: Genome-wide SNP genotyping as a simple and practical tool to accelerate the development of inbred lines in outbred tree species: An example in cacao (Theobroma cacao L.)
Source: PubMed Central journal article supplement (PMC9604995; doi:10.1371/journal.pone.0270437), 2022-10-26
Supplement: pone.0270437.s006.pdf [file pone.0270437.s006.pdf]

**A**

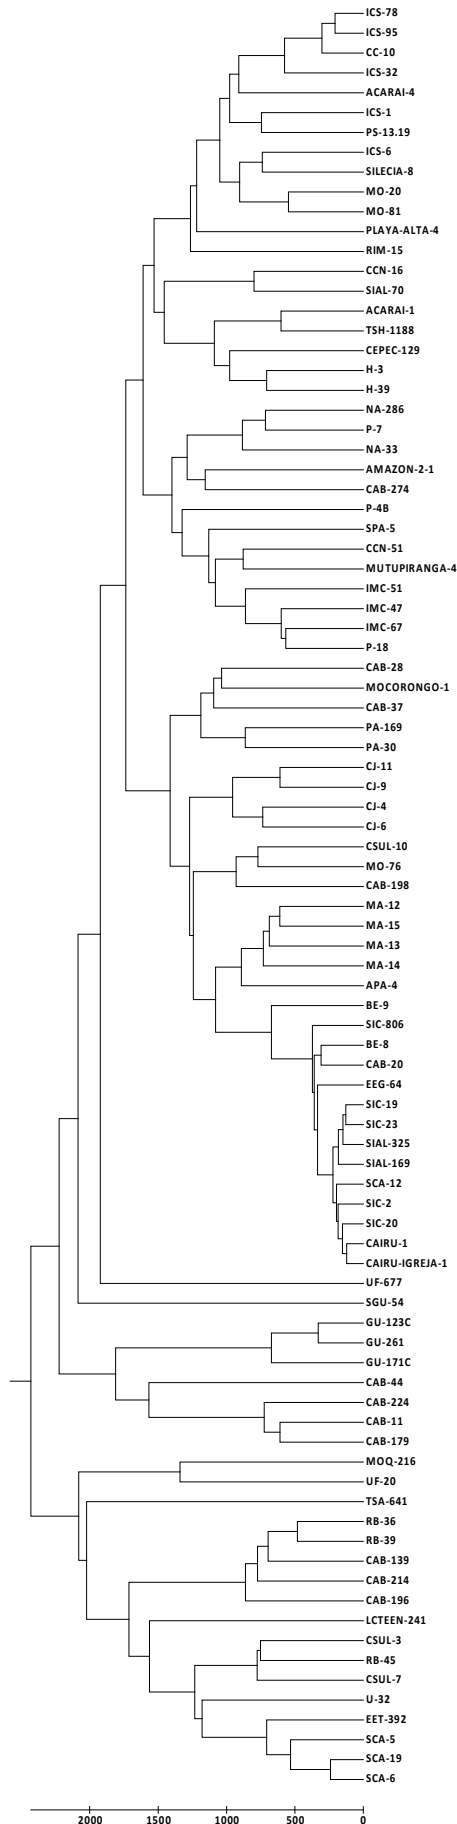

**B**

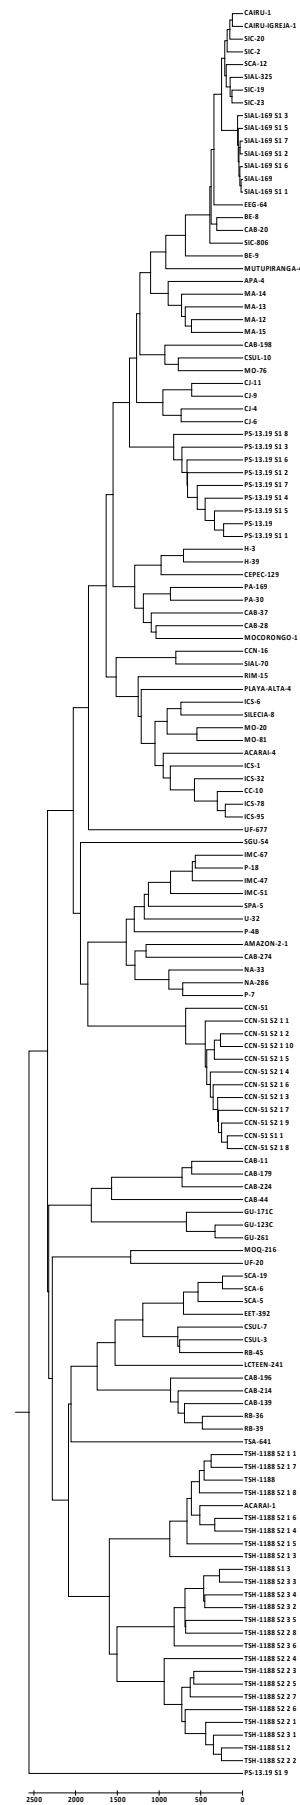

**Supporting File S6.** UPGMA dendrograms of **(A)** the 90 clones only and **(B)** all 139 plants (90 clones and 49 inbred individuals) based on the matrix of genetic distances estimated with 3380 SNPs.
